# Supplementary material for: Preparation of cucurbit[6]uril-modified polymer monolithic column for microextraction of nitroaromatics
Source: Royal Society of Chemistry journal article supplement (doi:10.1039/c4ra11944d), 2014-12-09
Supplement: c4ra11944d1.pdf [file c4ra11944d1.pdf]

Electronic Supplementary Material (ESI) for RSC Advances.  
This journal is © The Royal Society of Chemistry 2014

## SUPPORTING INFORMATION

### **Preparation of cucurbit[6]uril-modified polymer monolithic column for microextraction of nitroaromatics**

Haijiao Zheng <sup>a</sup>, Zheng Li <sup>a</sup>, Jingchun Zhang <sup>b</sup>, Jiutong Ma <sup>a</sup>, Yufeng Zhou <sup>a</sup>, Qiong Jia <sup>a, \*</sup>

<sup>a</sup> College of Chemistry, Jilin University, Qianjin Street 2699#, Changchun 130012, China

<sup>b</sup> China-Japan Union Hospital, Jilin University, Xiantai Street 126#, Changchun 130033, China

\* Corresponding author. E-mail address: jiaqiong@jlu.edu.cn (Q. Jia).

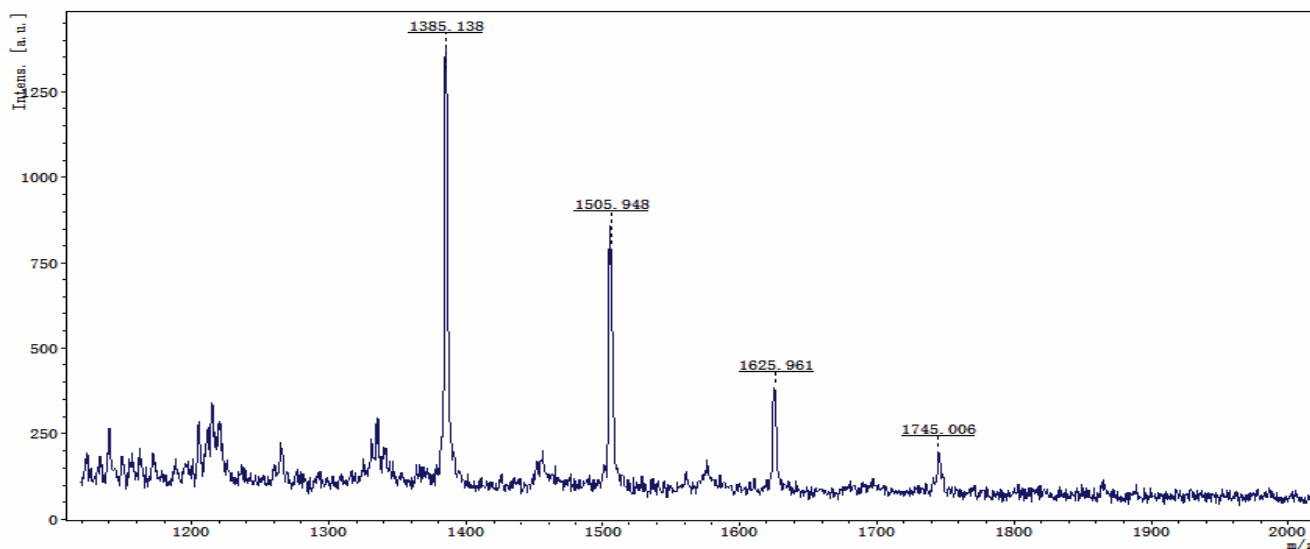

**Fig. S1.** The MALDI-TOF-MS spectra of CB[6]MR.

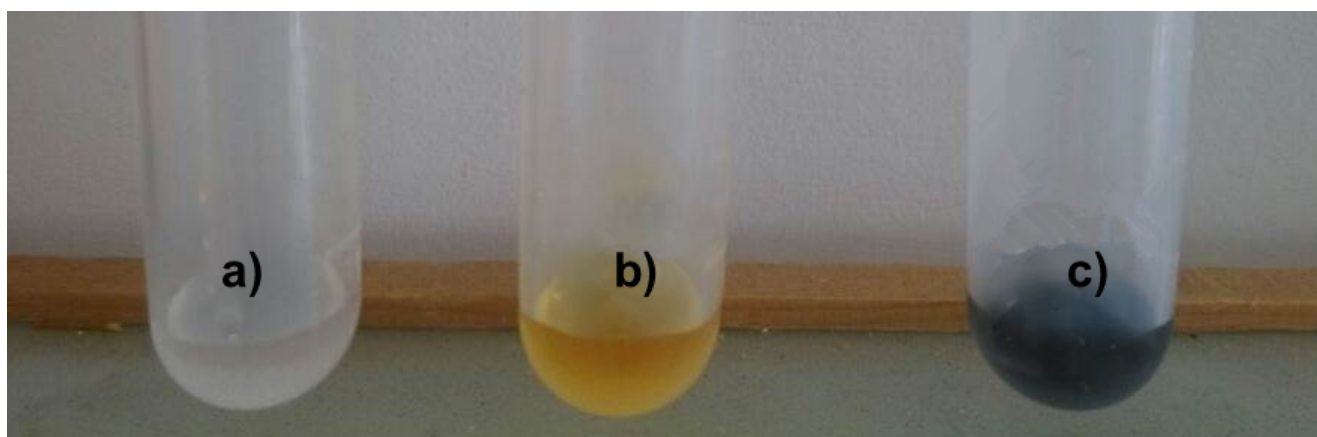

**Fig. S2.** Chromogenic reaction of phenolic hydroxyl groups (a) CB[6]MR, (b) the solution after color, and (c) FeCl<sub>3</sub> solution.

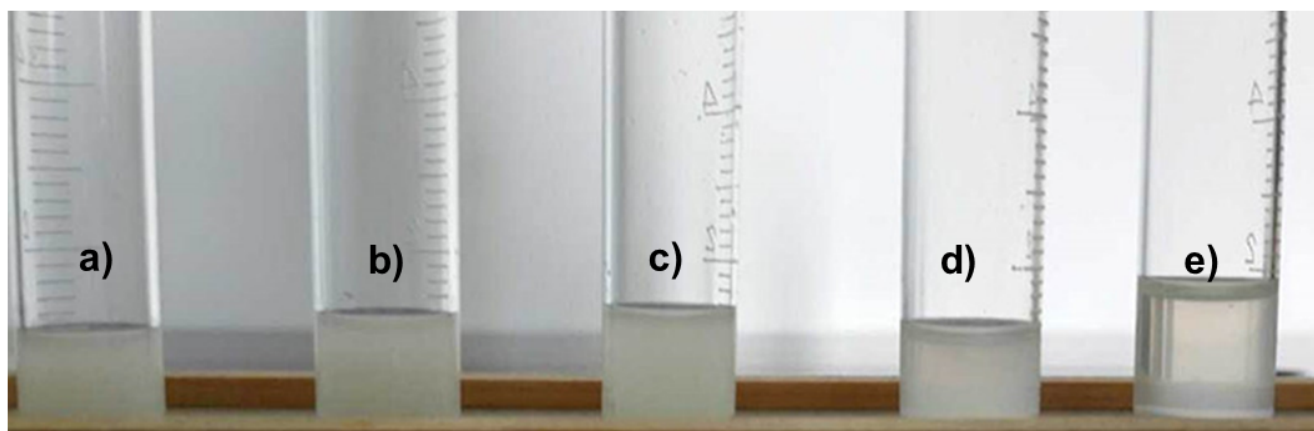

**Fig. S3.** Precipitation conditions with different proportion of CB[6]MR (placed after a week) A: 20 mg, B: 40 mg, C: 60 mg, D: 80 mg and E: 100 mg.

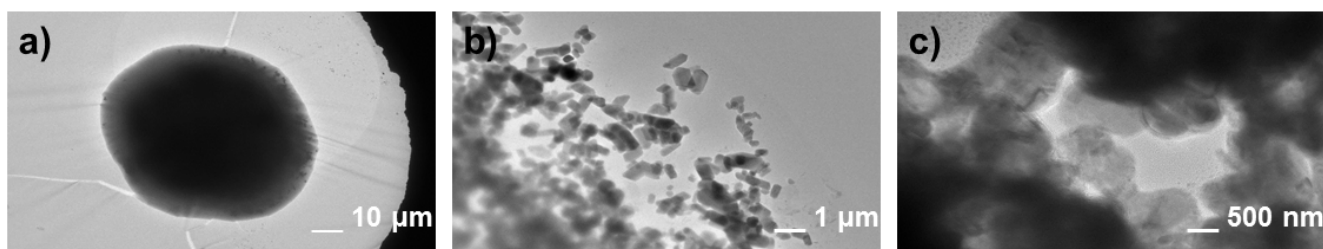

**Fig. S4.** TEM images of monolithic capillary: A: 10  $\mu\text{m}$ , B: 1  $\mu\text{m}$ , and C: 500 nm.

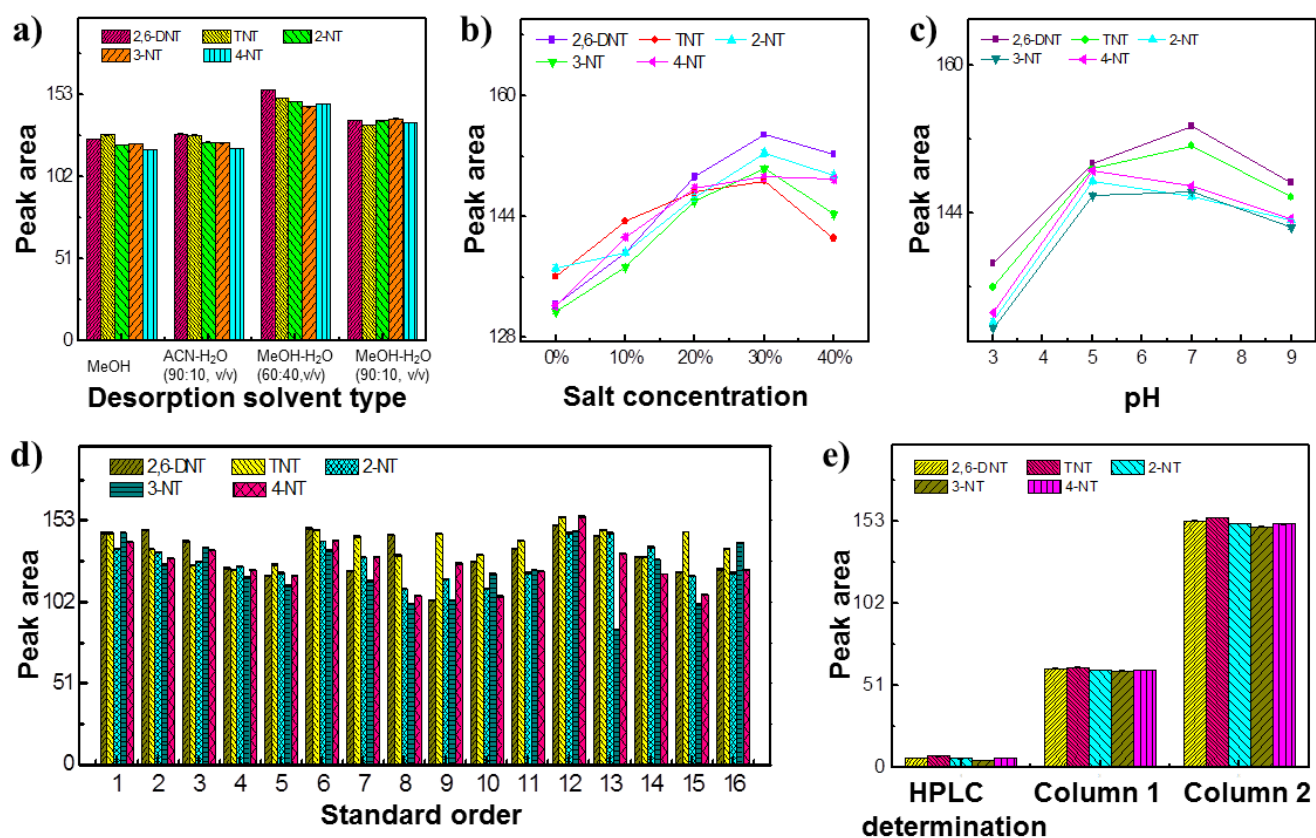

**Fig. S5.** Effects of various experimental parameters on the extraction efficiency: a), Effect of eluent species, b), Effect of sample pH, c), Effect of salt concentration, d), Results of orthogonal test, and e), Comparison of analytical performance of CB[6]MR@poly(GMA-EDMA) monolithic column (Column 2) with that of poly(GMA-EDMA) monolithic column (Column 1), and direct HPLC analysis. The concentration of nitroaromatics was 20 ng/mL.

**Table S1.** Composition of the polymerization mixtures used in the preparation of the CB[6]MR-decorated polymer monolithic column.

| Column | Monomer/<br>porogen | Monomers (% w/w) |      | Porogens (% w/w) |         | AIBN<br>(mg) | Temperature<br>(°C) | Permeability <sup>a</sup> |
|--------|---------------------|------------------|------|------------------|---------|--------------|---------------------|---------------------------|
|        |                     | GMA              | EDMA | 1-Dodecanol      | Toluene |              |                     |                           |
| M-1    | 30/70               | 18               | 12   | 63               | 7       | 4.5          | 60                  | General                   |
| M-2    | 35/65               | 21               | 14   | 58.5             | 6.5     | 4.5          | 60                  | Good                      |
| M-3    | 40/60               | 24               | 16   | 54               | 6       | 4.5          | 60                  | General                   |

<sup>a</sup> The permeabilities of monoliths were determined with flow rates, *i.e.*, the volume was determined when the solution passed through the monolith within certain time.

**Table S2.** The experimental design based on Taguchi's L<sub>16</sub> (4<sup>5</sup>) orthogonal array and the response of the peak area count by HPLC.

| Standard order | Factor <sup>a</sup> |      |      |      |     | Response <sup>b</sup> (peak area) |                  |
|----------------|---------------------|------|------|------|-----|-----------------------------------|------------------|
|                | A                   | B    | C    | D    | E   | Sum <sub>1</sub> <sup>c</sup>     | Sum <sub>2</sub> |
| 1              | 0.08                | 0.60 | 0.04 | 0.06 | 6.5 | 710.9                             | 709.4            |
| 2              | 0.08                | 0.80 | 0.05 | 0.07 | 7.0 | 670.5                             | 672.3            |
| 3              | 0.08                | 1.00 | 0.06 | 0.08 | 7.5 | 663.3                             | 660.1            |
| 4              | 0.08                | 1.20 | 0.07 | 0.09 | 8.0 | 609.1                             | 612.8            |
| 5              | 0.09                | 0.60 | 0.05 | 0.08 | 8.0 | 594.8                             | 587.6            |
| 6              | 0.09                | 0.80 | 0.04 | 0.09 | 7.5 | 710.7                             | 711.3            |
| 7              | 0.09                | 1.00 | 0.07 | 0.06 | 7.0 | 640.1                             | 645.2            |
| 8              | 0.09                | 1.20 | 0.06 | 0.07 | 6.5 | 592.4                             | 590.3            |
| 9              | 0.10                | 0.60 | 0.06 | 0.09 | 7.0 | 593.4                             | 593.9            |
| 10             | 0.10                | 0.80 | 0.07 | 0.08 | 6.5 | 594.3                             | 594.1            |
| 11             | 0.10                | 1.00 | 0.04 | 0.07 | 8.0 | 639.0                             | 638.2            |
| 12             | 0.10                | 1.20 | 0.05 | 0.06 | 7.5 | 752.7                             | 755.3            |
| 13             | 0.11                | 0.60 | 0.07 | 0.07 | 7.5 | 652.3                             | 652.1            |
| 14             | 0.11                | 0.80 | 0.06 | 0.06 | 8.0 | 644.8                             | 644.8            |
| 15             | 0.11                | 1.00 | 0.05 | 0.09 | 6.5 | 591.6                             | 592.3            |
| 16             | 0.11                | 1.20 | 0.04 | 0.08 | 7.0 | 639.6                             | 638.8            |

<sup>a</sup> Factors: A, sample flow rate (mL/min); B, sample volume (mL); C, eluent flow rate (mL/min); D, eluent volume; E, sample pH; <sup>b</sup> Peak areas; <sup>c</sup> Total peak area of five explosives

**Table S3.** The analysis of the variance of the main factors on the respective peak area of HPLC in water samples.

| Source <sup>a</sup> | Sum of Squares | df | Mean Square | F-value | Sig. <sup>b</sup> |
|---------------------|----------------|----|-------------|---------|-------------------|
| A                   | 2444.657       | 3  | 814.886     | 0.170   |                   |
| B                   | 1160.857       | 3  | 386.952     | 0.081   | *                 |
| C                   | 7430.497       | 3  | 2476.832    | 0.516   | *                 |
| D                   | 10587.967      | 3  | 3529.322    | 0.735   |                   |
| E                   | 14396.207      | 3  | 4798.735    | 1.000   | **                |
| Error               | 14396.21       | 3  | 4798.73     |         |                   |

<sup>a</sup> A, sample flow rate; B, sample volume; C, eluent flow rate; D, eluent volume; E, sample pH

<sup>b</sup> Significant level  $\alpha = 0.05$

\* and \*\*: significant at  $P \leq 0.01$  and  $P \leq 0.001$ , respectively.

**Table S4.** Analytical performance of the PMME method.

| Analytes | Correlation coefficient | Linear range (ng/mL) | Limit of detection (ng/mL) | Limit of quantification (ng/mL) | Enrichment factor | RSD (%) ( $n = 5$ ) |           |
|----------|-------------------------|----------------------|----------------------------|---------------------------------|-------------------|---------------------|-----------|
|          |                         |                      |                            |                                 |                   | Intra-day           | Inter-day |
| 2,6-DNT  | 0.9995                  | 10–500               | 0.025                      | 0.078                           | 24.5              | 1.7                 | 2.1       |
| TNT      | 0.9984                  | 10–500               | 0.022                      | 0.069                           | 27.8              | 1.8                 | 2.0       |
| 2-NT     | 0.9990                  | 10–500               | 0.034                      | 0.090                           | 28.3              | 2.2                 | 2.4       |
| 3-NT     | 0.9996                  | 10–500               | 0.036                      | 0.106                           | 35.5              | 2.8                 | 2.9       |
| 4-NT     | 0.9997                  | 10–500               | 0.056                      | 0.163                           | 26.9              | 2.2                 | 2.6       |

**Table S5.** Comparison of different sample preconcentration and detection methods for the determination of nitroaromatics.

| Preconcentration method | Detection method | LOD (ng/mL) | Samples          | Ref.      |
|-------------------------|------------------|-------------|------------------|-----------|
| MEPS                    | HPLC-UV          | 0.06–0.09   | Human blood      | 34        |
| SFE <sup>a</sup>        | GC-ECD           | 0.02–0.16   | Water samples    | 41        |
| MAE                     | GC-ECD           | 0.06–0.18   | Soil samples     | 42        |
| SPE                     | LC-MS            | 0.01–0.07   | Water samples    | 43        |
| DLLME <sup>b</sup>      | HPLC             | 0.04–0.40   | Water samples    | 44        |
| SPME                    | GC-MS            | 0.05–2.0    | Urine samples    | 45        |
| SPE and SOX             | HPLC             | 0.05–0.30   | Water samples    | 46        |
| LLE                     | HPLC             | >0.014      | Marine sediments | 47        |
| PMME                    | HPLC             | 0.022–0.056 | Human blood      | This work |

<sup>a</sup> supercritical fluid extraction; <sup>b</sup> dispersive liquid-liquid microextraction

**Table S6.** Application to real water and blood samples.

|                |                           |                      | 2,6-DNT     | TNT         | 2-NT        | 3-NT        | 4-NT        |
|----------------|---------------------------|----------------------|-------------|-------------|-------------|-------------|-------------|
| South Lake     | Found (ng/mL)             |                      | < LOD       |
|                | RR <sup>a</sup> ± RSD (%) | Level 1 <sup>b</sup> | 88.2 (4.5)  | 87.1 (5.2)  | 95.9 (4.3)  | 95.6 (5.2)  | 85.4 (4.7)  |
|                |                           | Level 2 <sup>c</sup> | 97.3 (5.2)  | 98.2 (4.3)  | 101.0 (4.9) | 99.3 (5.9)  | 96.8 (6.3)  |
| Yitong River   | Found (ng/mL)             |                      | 0.56        | < LOD       | < LOD       | < LOD       | < LOD       |
|                | RR ± RSD (%)              | Level 1              | 94.3 (5.7)  | 97.2 (6.2)  | 89.1 (4.6)  | 88.3 (5.9)  | 83.2 (6.9)  |
|                |                           | Level 2              | 106.0 (5.8) | 102.1 (5.7) | 98.7 (6.2)  | 104.1 (5.7) | 87.3 (11.2) |
| Ground water   | Found (ng/mL)             |                      | < LOD       | < LOD       | 0.43        | < LOD       | < LOD       |
|                | RR ± RSD (%)              | Level 1              | 92.7 (4.2)  | 88.2 (7.8)  | 98.4 (8.3)  | 93.2 (6.8)  | 94.3 (4.1)  |
|                |                           | Level 2              | 102.1 (4.7) | 95.3 (8.2)  | 107.9 (8.6) | 94.2 (8.9)  | 106.3 (5.4) |
| Drinking water | Found (ng/mL)             |                      | < LOD       |
|                | RR ± RSD (%)              | Level 1              | 84.9 (7.2)  | 95.2 (4.7)  | 86.4 (8.8)  | 89.3 (7.6)  | 101.1 (9.1) |
|                |                           | Level 2              | 97.2 (7.8)  | 98.3 (5.4)  | 95.4 (9.3)  | 102.6 (9.2) | 106.2 (9.7) |
| Blood sample 1 | Found (ng/mL)             |                      | < LOD       |
|                | RR ± RSD (%)              | Level 1              | 93.3 (4.2)  | 94.1 (3.3)  | 93.3 (3.7)  | 92.7 (5.1)  | 98.2 (3.2)  |
|                |                           | Level 2              | 106.4 (4.7) | 105.4 (4.1) | 101.9 (4.5) | 105.4 (5.7) | 109.9 (3.3) |
| Blood sample 2 | Found (ng/mL)             |                      | < LOD       | < LOD       | 0.33        | 0.48        | < LOD       |
|                | RR ± RSD (%)              | Level 1              | 89.2 (4.3)  | 91.3 (3.2)  | 94.5 (2.1)  | 97.5 (2.8)  | 91.8 (4.6)  |
|                |                           | Level 2              | 98.4 (5.1)  | 107.2 (3.9) | 106.9 (2.5) | 112.5 (5.3) | 104.3 (6.1) |
| Blood sample 3 | Found (ng/mL)             |                      | < LOD       | < LOD       | 0.37        | < LOD       | < LOD       |
|                | RR ± RSD (%)              | Level 1              | 97.2 (7.1)  | 88.2 (4.4)  | 98.1 (7.2)  | 93.5 (4.3)  | 88.7 (5.5)  |
|                |                           | Level 2              | 110.9 (8.9) | 100.9 (5.7) | 110.3 (8.7) | 102.1 (5.6) | 103.2 (6.9) |
| Blood sample 4 | Found (ng/mL)             |                      | < LOD       |
|                | RR ± RSD (%)              | Level 1              | 98.2 (3.1)  | 95.2 (2.7)  | 93.8 (4.6)  | 100.9 (5.1) | 99.3 (4.2)  |
|                |                           | Level 2              | 110.1 (3.8) | 109.2 (3.4) | 101.8 (5.3) | 111.8 (6.2) | 110.9 (5.6) |
| Blood sample 5 | Found (ng/mL)             |                      | < LOD       |
|                | RR ± RSD (%)              | Level 1              | 93.7 (2.3)  | 97.5 (3.4)  | 92.4 (3.1)  | 90.9 (2.8)  | 88.5 (3.7)  |
|                |                           | Level 2              | 95.3 (2.9)  | 95.4 (3.5)  | 98.6 (3.7)  | 97.2 (4.1)  | 98.7 (5.1)  |
| Blood sample 6 | Found (ng/mL)             |                      | < LOD       | 0.19        | < LOD       | < LOD       | < LOD       |
|                | RR ± RSD (%)              | Level 1              | 89.5 (5.3)  | 93.7 (2.4)  | 90.7 (7.1)  | 96.3 (4.2)  | 92.8 (5.1)  |
|                |                           | Level 2              | 102.3 (6.2) | 111.7 (3.2) | 98.3 (9.6)  | 109.2 (4.5) | 100.9 (6.7) |

<sup>a</sup> Real recovery; <sup>b</sup> 20 ng/mL spiked; <sup>c</sup> 50 ng/mL spiked.
